# Supplementary material
Source: publisher figshare collection journal article supplement (https://gsapubs.figshare.com/ndownloader/files/22758674)
Supplement: Supplementary file 1 [file 22758674]

## Data Repository DR2009036

### Huge Erratic Boulders in Tonga Deposited by a Prehistoric Tsunami

Cliff Frohlich, Matthew J. Hornbach, Frederick W. Taylor, Chuan-Chou Shen, 'Apai Moala, Allan E. Morton, Jens Kruger

This section contains Figure DR1 and Tables DR1, DR2, and DR3.

#### Section DR1: Dating of coral samples

All coral fossil samples were from erratic boulders sampled on southwestern Tongatapu (Table DR1). Nine carefully selected samples (Table DR2), with  $\geq 99$  per cent aragonite, were cut, cleaned with ultra-sonic probe for U-Th chemistry (Shen et al., 2003) and isotopic measurements were obtained on a multi-collector inductively-coupled plasma mass spectrometer (MC-ICP-MS), Thermo Electron Neptune. In the High-precision Mass Spectrometry and Environment Change Laboratory (HISPEC), Department of Geosciences, National Taiwan University, we have developed techniques for the MC-ICP-MS that utilize different data acquisition protocols for accurate determination of uranium and thorium isotopic ratios and concentration with 0.1‰-1‰ precision in 1,000-1 picomole quantities. We here employed a triple-spike,  $^{229}\text{Th}$ - $^{233}\text{U}$ - $^{236}\text{U}$ , isotope dilution method to correct mass bias and determine uranium concentration (Shen et al., 2002). The protocol we employed uses one newly-developed MasCom secondary electron multiplier (SEM) with repelling potential quadrupole (RPQ). A sample size of only 1-4 ng U is needed to offer the reproducibility (2 RSD) of 1-2‰ for isotopic measurements. The observation that there is no significant difference between measurements of standards in comparison with the coral and speleothem samples on ICP-sector-field-MS (ICP-SF-MS) and on MC-ICP-MS certify the developed MC-ICP-MS methodology (Fig. DR1). We exclude the dates of two altered samples, FRA1 with a low uranium content of 1.1 ppm and FR2A with a high initial  $\delta^{234}\text{U}$  value of  $156.2 \pm 2.4$  (Table DR2).

#### Section DR2: Estimating wave height

Several investigators have developed relationships of varying complexity to estimate the minimum necessary heights for storm and tsunami waves in terms of the

boulder's three linear dimensions and three hydrodynamic coefficients that describe the flow (e. g., Nott and Bryant, 2003; Noormets et al., 2004). In the text for Boulder #1 we apply Nott and Bryant's (2003) Equations (13) and (14), and obtain minimum wave height  $h_w$  estimates of 44 m and 19 m assuming boulder dimensions  $a$ ,  $b$ , and  $h$  of 15 m, 11 m, and 9 m, drag, lift, and inertial coefficients  $C_d$ ,  $C_l$ , and  $C_m$  of 1.2, 0.178, and 1.0, boulder and water densities  $\rho_b$  and  $\rho_w$  of 2.0 and 1.02 g/cm<sup>3</sup>, and  $\ddot{u}$  of 1.0 m/s<sup>2</sup>.

A similar but much simpler calculation obtains approximately the same result. If we assume that water in a wave has potential energy  $mgh$  when it impacts a shoreline where it loses altitude  $h$  and is converted to kinetic energy  $mV^2/2$ , and that the flow must have velocity  $V$  up to some fraction  $F$  of the boulder's height then:

$$\frac{1}{2}mV^2 = mg(h_w - Fh_b). \quad (\text{DR1})$$

The flow velocity  $V$  must be such that the drag force exceeds the boulder's weight. For a boulder of height and width  $h_b$ , the cross section  $A$  is  $\sim h_b^2$ ; if the boulder's density is  $\rho_b$ , the water density is  $\rho_w$ , and the drag coefficient is  $C$ , this assumption is:

$$\frac{1}{2}C\rho_w h_b^2 V^2 > g(\rho_b - \rho_w)h_b^3. \quad (\text{DR2})$$

Eliminating  $V$  from these two equations indicates the minimum wave height  $h_w$  to move a boulder will be:

$$h_w > \left[ \frac{1}{C} \left( \frac{\rho_b}{\rho_w} - 1 \right) + F \right] h_b. \quad (\text{DR3})$$

If one arbitrarily assumes that  $C$  and  $F$  are both about 1.0, then:

$$h_w > \frac{\rho_b}{\rho_w} h_b; \quad (\text{DR4})$$

i. e., the size of a wave to move a boulder of given density and height is proportional to the product of the boulder's relative density and its linear dimension.

For Boulder #1 this gives a minimum wave height of 20-25 m. Given the practical uncertainties concerning densities, drag and lift coefficients, etc., this result may be about as accurate as Nott and Bryant's (2003). Both make questionable assumptions about details but depend fundamentally on the principal that motive forces depend on

flow velocity and after a wave reaches shore flow velocities depend on wave potential energy.

### **Section DR3: Computer modeling**

For our tsunami modeling, for the gridded bathymetry we use General Bathymetric Chart of the Oceans (GEBCO) data with one arc-minute resolution for deep (> 500 m water depths) and SOPAC multibeam data with 30 m resolution in shallow water.

For volcanic flank collapses and slumps, all modeled slides are rotational, occur along near-vertical faults, and produce maximum slide accelerations according to Watt's slide model (Watts et al., 2005). We assume a terminal sliding velocity of 40 m/s. We use headwall lengths measured directly from bathymetric data to estimate slide thickness and slide diameter. Given the moderately poor constraints on slide size, slide volumes may be either larger or smaller than tabled values (Table DR3) and run-distances may also vary. Any increase in slide volume will cause a scaled increase in wave amplitude.

For earthquakes, we modeled tsunamis generated by hypothetical moment magnitude  $M_W$  9 earthquakes along both the Tonga and New Hebrides trenches. Our strategy was to specify fault geometries and locations consistent with regional seismicity and geology, and place the faults at the minimum depth so as to produce the maximum uplift of the ocean floor. Thus the hypothetical earthquakes had centroid depths of 35 km and slips of ~30 m along faults dipping at 30° with dimensions ~120 km x 1000 km. For sources along the Tonga trench the resulting tsunami impacts the eastern shores of Tongatapu and other islands in the Tonga arc with waves of up to 24 m (peak-to-trough) at the 100 m contour. The wave is considerably smaller (<12 m) at Fahefa and elsewhere on the west side of the islands. Similar models of  $M_W$  9 earthquakes along the New Hebrides trench generated even smaller (<1 m) waves impacting Tonga, mainly because regional bathymetry defocuses the waves away from western Tongatapu.

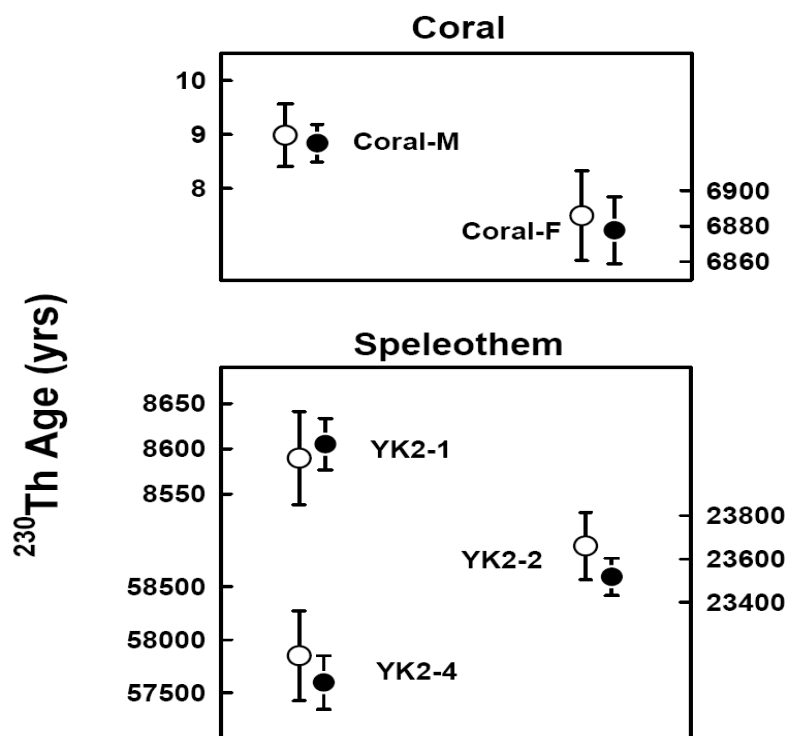

Figure DR1. Validation of age-determination method. Comparison of  $^{230}\text{Th}$  ages determined on ICP-SF-MS (hollow circles, Shen et al., 2002) and MC-ICP-MS (solid circles) for two coral *Porites* samples, Coral-M and Coral-F, collected from Nanwan, southern Taiwan, and three subsamples, YK2-1, YK2-2, and YK2-4, of one stalagmite, YK2, collected from southwestern China. All data are consistent within error.

**Table DR1. Locations and basic characteristics of erratic boulders on southwestern Tongatapu.** Latitudes and longitudes are determined using a handheld GPS instrument. Except as otherwise indicated, elevations and distances to shoreline are determined from Tonga Ministry of Land, Survey, Natural Resources and Environment, map series 2007. Heights are estimated by inspection or measured with a tape; circumferences are as measured with a tape. \*Samples selected for x-ray analysis.

| <i>boulder #</i> | <i>lat (°S)</i> | <i>long (°W)</i> | <i>nearby village</i> | <i>elevation (m above mean high tide level)</i> | <i>distance to shoreline (m)</i> | <i>orientation</i>  | <i>height (m)</i> | <i>circumference (m)</i>                     | <i>base undercut</i> | <i>samples collected</i>                             |
|------------------|-----------------|------------------|-----------------------|-------------------------------------------------|----------------------------------|---------------------|-------------------|----------------------------------------------|----------------------|------------------------------------------------------|
| 1                | 21.13496        | 175.34485        | Fahefa                | 9.4 <sup>a</sup>                                | 130                              | upright             | 9 m               | > 45 m<br>(measured below greatest diameter) | yes                  | FRA1*<br>FRB1<br>FRC*<br>FRD<br>FRE<br>FRF*<br>FR1F* |
| 2                | 21.13376        | 175.34422        | Fahefa                | 14 <sup>a</sup>                                 | 240                              | upright, but tilted | 4                 | 23 m                                         |                      | FR2A*<br>FR2B<br>FR2C                                |
| 3                | 21.14313        | 175.34070        | Fahefa                | 19±3                                            | 280                              | upright             | 4                 | 42                                           | yes                  | FR3A<br>FR3B*                                        |
| 4                | 21.14636        | 174.33991        | Fahefa                | ~20                                             | 430                              | upright             | 3-4               | 14                                           | yes, one side        | FR4A*                                                |
| 5                | 21.14605        | 175.33991        | Fahefa                | ~20                                             | 380                              | upright             | 5                 | 23                                           | yes, one side        | FR5A*                                                |
| 6                | 21.14560        | 175.33913        | Fahefa                | ~20                                             | 390                              | overturned          | 2-3               | 19                                           | yes                  | FR6A                                                 |
| 7                | 21.15320        | 175.33767        | Fahefa                | 14±3                                            | 160                              | overturned          | 5                 | 35                                           | yes                  | FR7A*                                                |

<sup>a</sup>Elevations determined by geodetic leveling.

**Table DR2. Uranium and thorium isotopic compositions and  $^{230}\text{Th}$  ages for Tonga coral fossils.** These data are from measurements on the MC-ICPMS at the Department of Geosciences, National Taiwan University. Analytical errors are  $2\sigma$  of the mean.

| Sample | Weight | $^{238}\text{U}$    |       | $^{232}\text{Th}$ |      | $\delta^{234}\text{U}$ |       | $[\text{}^{230}\text{Th}/\text{}^{238}\text{U}]$ |          | $[\text{}^{230}\text{Th}/\text{}^{232}\text{Th}]$ |       | Age         |       | Age                      |       | $\delta^{234}\text{U}_{\text{initial}}$ |       |
|--------|--------|---------------------|-------|-------------------|------|------------------------|-------|--------------------------------------------------|----------|---------------------------------------------------|-------|-------------|-------|--------------------------|-------|-----------------------------------------|-------|
| ID     | g      | ppb                 |       | ppt               |      | measured <sup>a</sup>  |       | activity <sup>b</sup>                            |          | ppm <sup>c</sup>                                  |       | uncorrected |       | corrected <sup>b,d</sup> |       | corrected <sup>e</sup>                  |       |
|        |        |                     |       |                   |      |                        |       |                                                  |          |                                                   |       |             |       |                          |       |                                         |       |
| FRA1   | 0.0525 | 1113.3 <sup>f</sup> | ± 1.9 | 597               | ± 13 | 104.8                  | ± 1.4 | 0.7974                                           | ± 0.0024 | 24553                                             | ± 553 | 135,241     | ± 882 | 135,228 <sup>f</sup>     | ± 882 | 153.6                                   | ± 2.1 |
| FRC    | 0.0540 | 2830.6              | ± 3.9 | 2380              | ± 14 | 104.1                  | ± 1.6 | 0.7824                                           | ± 0.0019 | 15364                                             | ± 95  | 130,612     | ± 737 | 130,592                  | ± 737 | 150.6                                   | ± 2.4 |
| FR1F   | 0.0965 | 1909.0              | ± 1.9 | 1681              | ± 8  | 98.9                   | ± 1.3 | 0.7520                                           | ± 0.0015 | 14097                                             | ± 69  | 122,647     | ± 531 | 122,627                  | ± 531 | 139.8                                   | ± 1.9 |
| FRF    | 0.0641 | 2233.2              | ± 3.4 | 1184              | ± 11 | 100.7                  | ± 1.6 | 0.7660                                           | ± 0.0017 | 23849                                             | ± 226 | 126,433     | ± 642 | 126,421                  | ± 643 | 143.9                                   | ± 2.3 |
| FR2A   | 0.0460 | 2700.0              | ± 4.8 | 1009              | ± 15 | 105.9                  | ± 1.6 | 0.8052                                           | ± 0.0021 | 35586                                             | ± 544 | 137,493     | ± 827 | 137,485 <sup>g</sup>     | ± 827 | 156.2                                   | ± 2.4 |
| FR3B   | 0.0634 | 2156.2              | ± 2.9 | 1383              | ± 11 | 106.8                  | ± 1.4 | 0.7809                                           | ± 0.0017 | 20107                                             | ± 167 | 129,482     | ± 624 | 129,467                  | ± 624 | 154.0                                   | ± 2.0 |
| FR4A   | 0.0544 | 2127.6              | ± 3.4 | 2033              | ± 13 | 104.8                  | ± 1.5 | 0.7655                                           | ± 0.0020 | 13226                                             | ± 92  | 125,289     | ± 689 | 125,267                  | ± 690 | 149.3                                   | ± 2.2 |
| FR5A   | 0.0792 | 2205.7              | ± 2.8 | 1496              | ± 9  | 105.0                  | ± 1.5 | 0.7696                                           | ± 0.0016 | 18730                                             | ± 119 | 126,455     | ± 587 | 126,439                  | ± 587 | 150.1                                   | ± 2.1 |
| FR7A   | 0.0498 | 2063.8              | ± 3.4 | 1392              | ± 14 | 105.2                  | ± 1.5 | 0.7691                                           | ± 0.0019 | 18830                                             | ± 196 | 126,264     | ± 685 | 126,249                  | ± 686 | 150.3                                   | ± 2.2 |

<sup>a</sup>  $\delta^{234}\text{U} = [\text{}^{234}\text{U}/\text{}^{238}\text{U}]_{\text{activity}}$

<sup>b</sup>  $[\text{}^{230}\text{Th}/\text{}^{238}\text{U}]_{\text{activity}} = 1 - e^{-\lambda_{230}T} + (\delta^{234}\text{U}_{\text{measured}}/1000)[\lambda_{230}/(\lambda_{230} - \lambda_{234})](1 - e^{-(\lambda_{230} - \lambda_{234})T})$ , where  $T$  is the age.

<sup>c</sup> The degree of detrital  $^{230}\text{Th}$  contamination is indicated by the  $[\text{}^{230}\text{Th}/\text{}^{232}\text{Th}]$  atomic ratio instead of the activity ratio.

<sup>d</sup> Decay constants are  $9.1577 \times 10^{-6} \text{ yr}^{-1}$  for  $^{230}\text{Th}$ ,  $2.8263 \times 10^{-6} \text{ yr}^{-1}$  for  $^{234}\text{U}$ , and  $1.55125 \times 10^{-10} \text{ yr}^{-1}$  for  $^{238}\text{U}$  (Cheng et al., 2000). Age corrections were calculated using an  $^{230}\text{Th}/^{232}\text{Th}$  atomic ratio of  $4 (\pm 4)$  ppm. Those are the values for a material at secular equilibrium, with the crustal  $^{232}\text{Th}/^{238}\text{U}$  value of 3.8. The errors are arbitrarily assumed to be 100%.

<sup>e</sup>  $\delta^{234}\text{U}_{\text{initial}}$  corrected was calculated based on  $^{230}\text{Th}$  age ( $T$ ), i.e.,  $\delta^{234}\text{U}_{\text{initial}} = \delta^{234}\text{U}_{\text{measured}} \times e^{\lambda_{234}T}$ , and  $T$  is corrected age.

<sup>f</sup>  $[\text{}^{238}\text{U}]$ : anomalously low

<sup>g</sup>  $\delta^{234}\text{U}_{\text{initial}}$ : anomalously high

**Table DR3. Parameters used for modeling slides and volcanic flank collapse.**

| <i>Model Parameter</i>                         | <i>Slide 1</i>   | <i>Slide 2</i>   | <i>Volcano 1</i> |
|------------------------------------------------|------------------|------------------|------------------|
| type                                           | rotational slump | rotational slump | rotational slump |
| diameter of Gaussian ( $2\sigma$ ) (m)         | 500              | 1030             | 4000             |
| maximum thickness (m)                          | 50               | 100              | 200              |
| approx. initial depth of failure (m)           | 140              | 450              | 400              |
| approx. final stopping depth (m)               | 200              | 600              | 500              |
| slide duration (s)                             | 6                | 4                | 10               |
| maximum speed (m/s)                            | 40               | 32               | 40               |
| distance from Fahefa shoreline (km)            | 0.18             | 5                | 35               |
| wave travel-time to shoreline (sec)            | 10               | 80               | 310              |
| peak-to-trough amplitude at 100 m contour (m)  | 10               | 4.8              | 14               |
| Peak-to-trough duration At 100 m contour (sec) | 21               | 40               | 80               |

## Additional References

- Cheng, H., Edwards, R.L., Hoff, J., Gallup, C.D., Richards, D.A., Amerom, Y., 2000, The half-lives of uranium-234 and thorium-230: *Chemical Geol.*, v. 169, p. 17-33.
- Noormets, R. Crook, K.A.W., and Felton, E.A., 2004, Sedimentology of rocky shorelines: 3. Hydrodynamics of megaclast emplacement and transport on a shore platform: Oahu, Hawaii: *Sedimentary Geol.*, v. 172, p. 41-65, doi:10.1016/j.sedgeo.2004.07.006.
- Okada, Y., 1985, Surface deformation due to shear and tensile faults in a half-space: *Bulletin of the Seismological Society of America*, v. 76, p. 1135-1154.
- Shen, C.-C. et al., 2002, Uranium and thorium isotopic and concentration measurements by magnetic sector inductively coupled plasma mass spectrometry: *Chemical Geol.*, v. 185, p. 165-178, doi:10.1016/S0009-2541(01)00404-1.
- Shen, C.-C. et al. , 2003, Measurement of attogram quantities of  $^{231}\text{Pa}$  in dissolved and particulate fractions of seawater by isotope dilution thermal ionization mass spectroscopy: *Anal. Chem.*, v. 75, p. 1075-1079, doi:10.1021/ac026247R.
- Watts, P., Grilli, S.T., Tappin, D.R., and Fryer, G. J., 2005, Tsunami generation by submarine mass failure part II: Predictive equations and case studies: *Journal of Waterway, Port, Coastal, and Ocean Engineering*, v. 131, p. 298-310, doi: 10.1061/(ASCE)0733-950X(2005)131:6(298).
